# Supplementary material for: Single nanoparticle of organic p-type and n-type hybrid materials: nanoscale phase separation and photovoltaic effect
Source: Royal Society of Chemistry journal article supplement (doi:10.1039/c1jm13952e), 2011-12-23
Supplement: c1jm13952e.pdf [file c1jm13952e.pdf]

## Supplementary information for

### Single Nanoparticle of Organic *p*-Type and *n*-Type Hybrid Materials:

#### Nanoscale Phase Separation and Photovoltaic Effect

*Yong-baek Lee<sup>a</sup>, Seok Ho Lee<sup>a</sup>, Kihyun Kim<sup>a</sup>, Jin Woo Lee<sup>a</sup>, Kyung-Yeon Han<sup>c</sup>,*

*Jeongyong Kim<sup>b</sup>, and Jinsoo Joo<sup>a\*</sup>*

<sup>a</sup>Department of Physics, Korea University, Seoul 136-713, Korea

<sup>b</sup>Department of Physics, University of Incheon, Incheon 406-772, Korea

<sup>c</sup>Department of Chemical and Biological Engineering, Korea University, Seoul 136-713, Korea

\*Corresponding author. E-mail: [jjoo@korea.ac.kr](mailto:jjoo@korea.ac.kr) (J. Joo); Fax: +82-2-927-3292; Tel: +82-2-3290-3103

This Supporting Information presents the photoresponsive *I-V* characteristic curves of another hybrid single NP at low bias region.

- (1) The magnification of the photoresponsive *I-V* characteristic curves of the single NP at low bias region

The magnification of the photoresponsive *I-V* characteristic curves (in Figure 7) for the annealed P3HT/PCBM (1:2 wt%) single NP at low bias region is shown in Figure S1. The open-circuit voltage ( $V_{oc}$ ) and short-circuit current ( $I_{sc}$ ) were measured to be about 2.70 V and

39.26 pA, respectively. The value of  $V_{oc}$  can be related to energy difference between HOMO and LUMO levels of P3HT and PCBM. We suggest that the relatively high  $V_{oc}$  might originate from the thermal effect induced by focused laser and sufficiently high bias on hybrid NP.

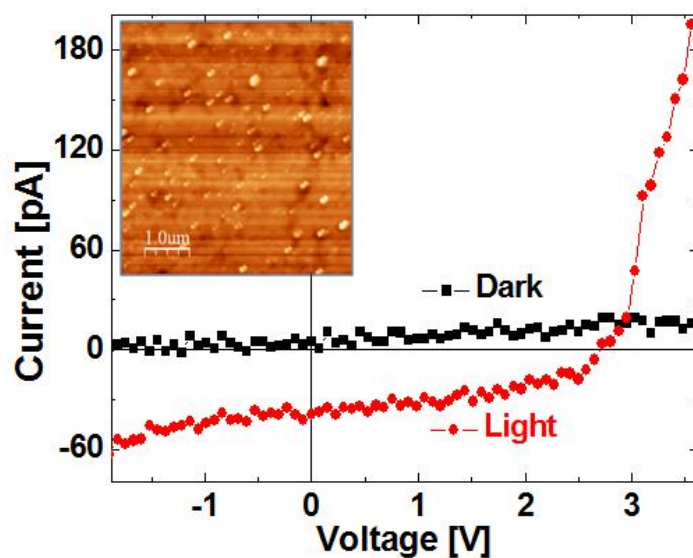

**Fig. S1** Photovoltaic  $I$ - $V$  characteristic curves of the annealed P3HT/PCBM (1:2 wt%) single NPs. Inset: AFM topographic image of the P3HT/PCBM hybrid NPs.
